# Supplementary material for: Natural Product Potential of the Genus Nocardiopsis
Source: PubMed Central journal article supplement (PMC5983278; doi:10.3390/md16050147), 2018-04-29
Supplement: marinedrugs-16-00147-s001.pdf [file marinedrugs-16-00147-s001.pdf]

### Supplementary data

| Compound number | InChI                                                                                                                                                                                                                  | InChiKeys                           |
|-----------------|------------------------------------------------------------------------------------------------------------------------------------------------------------------------------------------------------------------------|-------------------------------------|
| 1               | InChI=1S/C16H12N2O6/c1-8(19)24-18-11-6-9(2-4-13(11)20)15-17-12-7-10(16(21)22)3-5-14(12)23-15/h2-7,18,20H,1H3,(H,21,22)                                                                                                 | AJYUYIZKZZSUT<br>Q-UHFFFAOYSA-N     |
| 2               | InChI=1S/C14H12N2O3/c15-10-6-9(2-3-12(10)18)14-16-11-5-8(7-17)1-4-13(11)19-14/h1-6,17-18H,7,15H2                                                                                                                       | QDKBOYBNGQT<br>APK-<br>UHFFFAOYSA-N |
| 3               | InChI=1S/C16H14N2O5/c1-9(20)23-18-12-7-11(3-4-14(12)21)16-17-13-6-10(8-19)2-5-15(13)22-16/h2-7,18-19,21H,8H2,1H3                                                                                                       | DLEOXPYODXX<br>MQL-<br>UHFFFAOYSA-N |
| 4               | InChI=1S/C15H11NO4/c17-7-9-1-4-14-12(5-9)16-15(20-14)10-2-3-13(19)11(6-10)8-18/h1-6,8,17,19H,7H2                                                                                                                       | SQJFTGHIDYFTI<br>D-UHFFFAOYSA-N     |
| 5               | InChI=1S/C16H13NO5/c18-7-9-1-4-15-12(5-9)17-16(22-15)10-2-3-13(20)11(6-10)14(21)8-19/h1-6,18-20H,7-8H2                                                                                                                 | MVGWDWHBEA<br>GUKI-<br>UHFFFAOYSA-N |
| 6               | InChI=1S/C14H11NO3/c16-8-9-1-6-13-12(7-9)15-14(18-13)10-2-4-11(17)5-3-10/h1-7,16-17H,8H2                                                                                                                               | CSCMODQTLPIE<br>MH-<br>UHFFFAOYSA-N |
| 7               | InChI=1S/C15H13NO4/c1-19-14-7-10(18)3-4-11(14)15-16-12-6-9(8-17)2-5-13(12)20-15/h2-7,17-18H,8H2,1H3                                                                                                                    | FMKKXSLFSSVD<br>CS-<br>UHFFFAOYSA-N |
| 8               | InChI=1S/C13H23N3O/c1-10(2)7-5-3-4-6-8-11(17)12-13(14)16-9-15-12/h9-10H,3-8,14H2,1-2H3,(H,15,16)                                                                                                                       | WMNFVUHNJUD<br>HER-<br>UHFFFAOYSA-N |
| 9               | InChI=1S/C14H25N3O/c1-3-11(2)8-6-4-5-7-9-12(18)13-14(15)17-10-16-13/h10-11H,3-9,15H2,1-2H3,(H,16,17)                                                                                                                   | OPDPHQGPKVQ<br>MGO-<br>UHFFFAOYSA-N |
| 10              | InChI=1S/C27H28N4O2/c1-4-26(2,3)27-14-22-23(32)29-21(13-16-15-28-19-11-7-5-9-17(16)19)24(33)31(22)25(27)30-20-12-8-6-10-18(20)27/h4-12,15,21-22,25,28,30H,1,13-14H2,2-3H3,(H,29,32)/t21-,22-,25?,27+/m0/s1             | VBYPRAJLFYXB<br>BP-<br>PBJMKJCMSA-N |
| 11              | InChI=1S/C32H36N4O2/c1-7-29(3,4)31-17-23-25(37)36-24(26(38)35(23)27(31)33-21-15-11-9-13-19(21)31)18-32(30(5,6)8-2)20-14-10-12-16-22(20)34-28(32)36/h7-16,23-24,27-28,33-34H,1-2,17-18H2,3-6H3/t23-,24+,27?,28?,31+,32- | VKEAHNPXYMH<br>YJJ-<br>LAKZOROHSA-N |
| 12              | InChI=1S/C7H10N2O2/c10-6-4-8-7(11)5-2-1-3-9(5)6/h5H,1-4H2,(H,8,11)                                                                                                                                                     | OWOHLURDBZH<br>NGG-<br>UHFFFAOYSA-N |
| 13              | InChI=1S/C11H18N2O2/c1-7(2)6-8-11(15)13-5-3-4-9(13)10(14)12-8/h7-9H,3-6H2,1-2H3,(H,12,14)                                                                                                                              | SZJNCZMRZAUN<br>QT-<br>UHFFFAOYSA-N |

|    |                                                                                                                                    |                                     |
|----|------------------------------------------------------------------------------------------------------------------------------------|-------------------------------------|
| 14 | InChI=1S/C11H18N2O3/c1-6(2)3-8-11(16)13-5-7(14)4-9(13)10(15)12-8/h6-9,14H,3-5H2,1-2H3,(H,12,15)                                    | YEHUWVXPQQ<br>DMC-<br>UHFFFAOYSA-N  |
| 15 | InChI=1S/C17H10ClN3O2S/c18-12-7-3-1-5-10(12)14-9-24-17(20-14)21-15(22)11-6-2-4-8-13(11)19-16(21)23/h1-9H,(H,19,23)                 | XOUVQBQYRLT<br>UIV-<br>UHFFFAOYSA-N |
| 16 | InChI=1S/C10H14O2/c1-4-7(2)9-6-5-8(3)10(11)12-9/h5-7H,4H2,1-3H3/t7-/m1/s1                                                          | MGLYOXCODWY<br>DGM-<br>SSDOTTSWSA-N |
| 17 | InChI=1S/C11H16O2/c1-4-8(3)10-7-6-9(5-2)11(12)13-10/h6-8H,4-5H2,1-3H3/t8-/m1/s1                                                    | PFHBQBOWTML<br>EJD-<br>MRVPVSSYSA-N |
| 18 | InChI=1S/C10H14O3/c1-3-7(2)9-5-4-8(6-11)10(12)13-9/h4-5,7,11H,3,6H2,1-2H3/t7-/m1/s1                                                | YGWDSGLEFHL<br>HNC-<br>SSDOTTSWSA-N |
| 19 | InChI=1S/C10H14O3/c1-6-4-5-9(13-10(6)12)7(2)8(3)11/h4-5,7-8,11H,1-3H3/t7-,8?/m1/s1                                                 | SZVFNJKDIZEIM<br>R-<br>GVHYBUMESA-N |
| 20 | InChI=1S/C10H14O3/c1-4-10(3,12)8-6-5-7(2)9(11)13-8/h5-6,12H,4H2,1-3H3/t10-/m1/s1                                                   | FZRIAELUSZPPO<br>S-SNVBAGLBSA-<br>N |
| 21 | InChI=1S/C11H16O3/c1-4-9-6-5-8(10(12)14-9)7-11(2,3)13/h5-6,13H,4,7H2,1-3H3                                                         | YLTBUTSTBPLR<br>GO-<br>UHFFFAOYSA-N |
| 22 | InChI=1S/C9H12O3/c1-3-6-5-8(10)7(4-2)9(11)12-6/h5,10H,3-4H2,1-2H3                                                                  | YZKHJSNBJTVB<br>QW-<br>UHFFFAOYSA-N |
| 23 | InChI=1S/C11H16O3/c1-4-8-6-10(12)9(5-7(2)3)11(13)14-8/h6-7,12H,4-5H2,1-3H3                                                         | LLSJXJAHLPCJO<br>Q-UHFFFAOYSA-<br>N |
| 24 | InChI=1S/C11H16O3/c1-7(2)6-9-4-5-10(8(3)12)14-11(9)13/h4-5,7-8,12H,6H2,1-3H3                                                       | SGBVQGMWPRF<br>HKS-<br>UHFFFAOYSA-N |
| 25 | InChI=1S/C11H16O2/c1-4-10-6-5-9(7-8(2)3)11(12)13-10/h5-6,8H,4,7H2,1-3H3                                                            | MKZUGSPKAYX<br>MHH-<br>UHFFFAOYSA-N |
| 26 | InChI=1S/C10H14O3/c1-4-6(2)9-5-8(11)7(3)10(12)13-9/h5-6,11H,4H2,1-3H3/t6-/m1/s1                                                    | QKYRDLBTCVVF<br>JE-ZCFIWIBFSA-<br>N |
| 27 | InChI=1S/C15H26O2/c1-11-6-5-7-12(2)14(16)10-13(9-8-11)15(3,4)17/h7-9,11,13-14,16-17H,5-6,10H2,1-4H3/b9-8+,12-7-/t11-,13+,14-/m0/s1 | DXVZUYIXOHXN<br>BU-<br>ZQZRAIAYSA-N |
| 28 | InChI=1S/C15H24O2/c1-11-5-7-13(15(3,4)17)8-6-12(2)10-14(16)9-11/h5,7,10-11,13,17H,6,8-9H2,1-4H3/b7-5+,12-10-/t11-,13-/m1/s1        | NRZAKJLNYYCG<br>MN-<br>CQTPFTFLSA-N |
| 29 | InChI=1S/C12H22O3/c1-8-3-4-10(14)11(2)7-9(13)5-6-12(8,11)15/h8-10,13-15H,3-7H2,1-2H3/t8-,9+,10+,11+,12-/m0/s1                      | TVBXZYIQQHPC<br>FC-KQSJRHEJSA-<br>N |
| 30 | InChI=1S/C12H22O4/c1-5-9(13)8(3)10(14)12(4)6-                                                                                      | QKUJZCQQUIM                         |

|    |                                                                                                                                                                                                                                                                  |                                         |
|----|------------------------------------------------------------------------------------------------------------------------------------------------------------------------------------------------------------------------------------------------------------------|-----------------------------------------|
|    | 7(2)11(15)16-12/h7-10,13-14H,5-6H2,1-4H3/t7-<br>,8?,9?,10?,12-/m1/s1                                                                                                                                                                                             | AA-<br>KRYQXMBOSA-N                     |
| 31 | InChI=1S/C12H22O4/c1-5-6-11(3,15)10(14)12(4)7-<br>8(2)9(13)16-12/h8,10,14-15H,5-7H2,1-4H3/t8-<br>,10?,11?,12-/m1/s1                                                                                                                                              | CMRPPBFRIS<br>ET<br>MO-<br>OZOYIQBDSA-N |
| 32 | InChI=1S/C23H38O6/c1-7-21-15(4)10-13(2)8-9-<br>19(25)14(3)11-18(17(6)24)23(28)16(5)20(26)12-<br>22(27)29-21/h8-10,14-18,20-21,23-24,26,28H,7,11-<br>12H2,1-6H3/b9-8+,13-10+/t14-,15+,16-,17-,18+,20-<br>,21-,23+/m0/s1                                           | LIMMXDFDIDWI<br>HU-<br>FDDVHUOSSA-N     |
| 33 | InChI=1S/C14H20O3/c1-6-9(2)7-8-12-10(3)13(16-<br>5)11(4)14(15)17-12/h7-9H,6H2,1-5H3/b8-7+/t9-<br>/m1/s1                                                                                                                                                          | LEOSHPKVZGISF<br>K-FCZSHJHJSA-N         |
| 34 | InChI=1S/C28H43NO7/c1-16-9-17(2)11-<br>19(4)27(33)20(15-29)7-5-6-8-25(22-12-21(30)13-<br>23(22)28(34)35)36-26(32)14-24(31)18(3)10-16/h5-<br>7,16-19,21-25,27,30-31,33H,8-14H2,1-<br>4H3,(H,34,35)/b6-5+,20-7+/t16-,17-,18+,19+,21-<br>,22?,23+,24-,25+,27+/m1/s1 | XPAMOXHOVDB<br>ZNA-<br>KQZSSORHSA-N     |
| 35 | InChI=1S/C28H43NO7/c1-16-9-17(2)11-<br>19(4)27(33)20(15-29)7-5-6-8-25(22-12-21(30)13-<br>23(22)28(34)35)36-26(32)14-24(31)18(3)10-16/h5-<br>7,16-19,21-25,27,30-31,33H,8-14H2,1-<br>4H3,(H,34,35)/b6-5+,20-7+/t16-,17-<br>,18+,19+,21+,22?,23+,24-,25+,27+/m1/s1 | XPAMOXHOVDB<br>ZNA-<br>LGWQXCRGSA-N     |
| 36 | InChI=1S/C27H41NO7/c1-16-11-12-22(29)17(2)13-<br>18(3)23(30)14-25(31)35-24(20-8-6-9-<br>21(20)27(33)34)10-5-4-7-19(15-28)26(16)32/h4-<br>5,7,16-18,20-24,26,29-30,32H,6,8-14H2,1-<br>3H3,(H,33,34)/b5-4+,19-7+/t16-,17-,18-,20?,21-<br>,22+,23+,24-,26-/m0/s1    | IKAWPOUWBBIC<br>MH-<br>QUJKPQATSA-N     |
| 37 | InChI=1S/C27H41NO6/c1-17-8-6-9-<br>18(2)26(31)20(16-28)10-4-5-13-24(21-11-7-12-<br>22(21)27(32)33)34-25(30)15-23(29)19(3)14-17/h4-<br>5,10,17-19,21-24,26,29,31H,6-9,11-15H2,1-<br>3H3,(H,32,33)/b5-4+,20-10+/t17-<br>,18+,19+,21?,22+,23-,24+,26+/m1/s1         | UQJWAODIRWC<br>VRY-<br>FLZVVRJXSA-N     |
| 38 | InChI=1S/C20H16O5/c1-20(24)8-10-6-7-12-<br>17(15(10)13(21)9-20)19(23)11-4-3-5-14(25-<br>2)16(11)18(12)22/h3-7,24H,8-9H2,1-2H3/t20-/m1/s1                                                                                                                         | XZLGWJORNHET<br>KI-<br>HXUWFJFHSA-N     |
| 39 | InChI=1S/C20H18O5/c1-20(24)8-10-6-7-12-<br>17(15(10)13(21)9-20)19(23)11-4-3-5-14(25-<br>2)16(11)18(12)22/h3-7,18,22,24H,8-9H2,1-<br>2H3/t18?,20-/m1/s1                                                                                                           | RHBBTFAZTFDH<br>EG-<br>ROPPNANJSA-N     |
| 40 | InChI=1S/C20H18N2O3/c1-24-16-10-8-15(9-11-<br>16)13-18-20(25-2)22-17(19(23)21-18)12-14-6-4-3-5-<br>7-14/h3-13H,1-2H3,(H,21,23)/b17-12-,18-13-                                                                                                                    | CYZMZJISYQZN<br>AE-<br>MZGHLJKDSA-N     |
| 41 | InChI=1S/C20H18N2O3/c1-24-16-10-8-15(9-11-<br>16)13-18-20(25-2)22-17(19(23)21-18)12-14-6-4-3-5-<br>7-14/h3-13H,1-2H3,(H,21,23)/b17-12-,18-13-                                                                                                                    | CYZMZJISYQZN<br>AE-<br>MZGHLJKDSA-N     |

|    |                                                                                                                                                  |                                     |
|----|--------------------------------------------------------------------------------------------------------------------------------------------------|-------------------------------------|
| 42 | InChI=1S/C20H18N2O3/c1-24-16-10-8-15(9-11-16)12-17-19(23)21-18(20(22-17)25-2)13-14-6-4-3-5-7-14/h3-13H,1-2H3,(H,21,23)/b17-12-,18-13-            | UQGUUQAUHGS<br>KIS-<br>MZGHLJKDSA-N |
| 43 | InChI=1S/C11H14O2/c1-4-5-8(2)10-7-6-9(3)11(12)13-10/h5-7H,4H2,1-3H3/b8-5+                                                                        | PBQULXLDQBOQ<br>EV-<br>VMPITWQZSA-N |
| 44 | InChI=1S/C12H14O3/c1-7-5-6-11(15-12(7)14)9(3)8(2)10(4)13/h5-6H,1-4H3/b9-8+                                                                       | FCISLHWNONCL<br>CE-<br>CMDGGOBGSA-N |
| 45 | InChI=1S/C12H16O3/c1-7-5-6-11(15-12(7)14)9(3)8(2)10(4)13/h5-6,10,13H,1-4H3/b9-8+                                                                 | DPIOXNJRDMNK<br>DX-<br>CMDGGOBGSA-N |
| 46 | InChI=1S/C12H16O3/c1-4-5-8(2)11-7-6-10(9(3)13)12(14)15-11/h5-7,9,13H,4H2,1-3H3/b8-5+                                                             | VSEOEXSPCMUH<br>TQ-<br>VMPITWQZSA-N |
| 47 | InChI=1S/C11H16O4/c1-4-8(12)11(3,14)9-6-5-7(2)10(13)15-9/h5-6,8,12,14H,4H2,1-3H3                                                                 | NZUBKBRDWGW<br>BNG-<br>UHFFFAOYSA-N |
| 48 | InChI=1S/C12H18O4/c1-4-8-6-7-10(16-11(8)14)12(3,15)9(13)5-2/h6-7,9,13,15H,4-5H2,1-3H3                                                            | VNKYTWPVKUB<br>ULZ-<br>UHFFFAOYSA-N |
| 49 | InChI=1S/C13H20O4/c1-8(2)7-10-5-6-11(17-12(10)15)13(4,16)9(3)14/h5-6,8-9,14,16H,7H2,1-4H3/t9-,13-/m0/s1                                          | PUHCIPQAMDGU<br>GT-<br>ZANVPECISA-N |
| 50 | InChI=1S/C16H25N3O4/c1-10(20)5-4-7-17-15(23)16(3)6-8-19-12(9-16)13(21)18-11(2)14(19)22/h11-12H,4-9H2,1-3H3,(H,17,23)(H,18,21)/t11?,12?,16-/m1/s1 | SUEITZDEFMXE<br>AW-<br>ZEPSKSRBSA-N |
| 51 | InChI=1S/C20H18N2O4/c1-25-16-9-5-14(6-10-16)12-18-20(26-2)22-17(19(24)21-18)11-13-3-7-15(23)8-4-13/h3-12,23H,1-2H3,(H,21,24)/b17-11-,18-12-      | SNSZPOPKOYKH<br>DP-<br>WHYMJUELSA-N |
| 52 | InChI=1S/C21H20N2O4/c1-23-19(13-15-6-10-17(26-2)11-7-15)20(27-3)22-18(21(23)25)12-14-4-8-16(24)9-5-14/h4-13,24H,1-3H3/b18-12-,19-13-             | HRMZDSPJGINL<br>AD-<br>BKHHGCLFSA-N |
| 53 | InChI=1S/C22H22N2O4/c1-24-20(14-16-7-11-18(27-3)12-8-16)21(28-4)23-19(22(24)25)13-15-5-9-17(26-2)10-6-15/h5-14H,1-4H3/b19-13-,20-14-             | PIZYGUXDBZYK<br>HO-<br>AXPXABNXSA-N |
| 54 | InChI=1S/C21H20N2O3/c1-23-19(14-16-9-11-17(25-2)12-10-16)20(26-3)22-18(21(23)24)13-15-7-5-4-6-8-15/h4-14H,1-3H3/b18-13-,19-14-                   | NCBOROGHSUX<br>ZPE-<br>SXQSXHJWSA-N |
| 55 | InChI=1S/C20H18N2O3/c1-22-18(13-15-8-10-16(25-2)11-9-15)19(23)21-17(20(22)24)12-14-6-4-3-5-7-14/h3-13H,1-2H3,(H,21,23)/b17-12-,18-13-            | NTIUCMLVFKVN<br>DG-<br>MZGHLJKDSA-N |
| 56 | InChI=1S/C16H18N2O3/c1-10(2)8-13-15(19)18-14(16(20)17-13)9-11-4-6-12(21-3)7-5-11/h4-10H,1-3H3,(H,17,20)(H,18,19)/b13-8-,14-9-                    | YRVUIYSTPTWL<br>CY-<br>QKPPEBSVSA-N |
| 57 | InChI=1S/C10H11NO3/c12-6-7-5-11(7)10(14)8-3-1-2-4-9(8)13/h1-4,7,12-13H,5-6H2/t7-,11?/m0/s1                                                       | WQZHSQZSDAD<br>XLF-                 |

|    |                                                                                                                                                                                                                           |                                      |
|----|---------------------------------------------------------------------------------------------------------------------------------------------------------------------------------------------------------------------------|--------------------------------------|
|    |                                                                                                                                                                                                                           | RGENBBCFSA-N                         |
| 58 | InChI=1S/C10H13NO4/c12-5-7(6-13)11-10(15)8-3-1-2-4-9(8)14/h1-4,7,12-14H,5-6H2,(H,11,15)                                                                                                                                   | DQQQCYBNT<br>EEO-<br>UHFFFAOYSA-N    |
| 59 | InChI=1S/C7H9NO4/c9-2-1-6(10)8-5-3-7(11)12-4-5/h3,9H,1-2,4H2,(H,8,10)                                                                                                                                                     | FYESINSTVTVKD<br>J-UHFFFAOYSA-<br>N  |
| 60 | InChI=1S/C10H9NO2/c1-13-9-6-11-10(12)8-5-3-2-4-7(8)9/h2-6H,1H3,(H,11,12)                                                                                                                                                  | ITVVDKFBWYVG<br>PV-<br>UHFFFAOYSA-N  |
| 61 | InChI=1S/C16H26O2/c1-6-8-12(4)15-13(5)10-14(16(17)18-15)9-11(3)7-2/h10-12H,6-9H2,1-5H3                                                                                                                                    | JTEPOCODFJKCC<br>N-UHFFFAOYSA-<br>N  |
| 62 | InChI=1S/C26H48N2O6/c1-6-19-12-9-15-27-25(32)20(7-2)11-8-10-16(3)13-14-21(19)34-26-24(31)22(28-18(5)29)23(30)17(4)33-26/h16-17,19-24,26,30-31H,6-15H2,1-5H3,(H,27,32)(H,28,29)/t16-,17-,19+,20+,21+,22-,23+,24+,26-/m0/s1 | WEVZGKSDDNC<br>UFL-<br>WOTYRYJGSA-N  |
| 63 | InChI=1S/C26H38O7/c1-12-17(29)19-24(6)10-9-16(33-14(3)27)23(4,5)18(24)15(28)11-25(19,7)20-22(31)32-13(2)21(30)26(12,20)8/h13,15-20,28-29H,1,9-11H2,2-8H3/t13-,15-,16-,17+,18?,19?,20?,24+,25-,26+/m0/s1                   | ZCWNEJRDFYFTT<br>HU-NPJNTPFJSA-<br>N |
